# Supplementary material
Source: ML conference proceedings conference paper supplement (https://aclanthology.org/P17-2093)

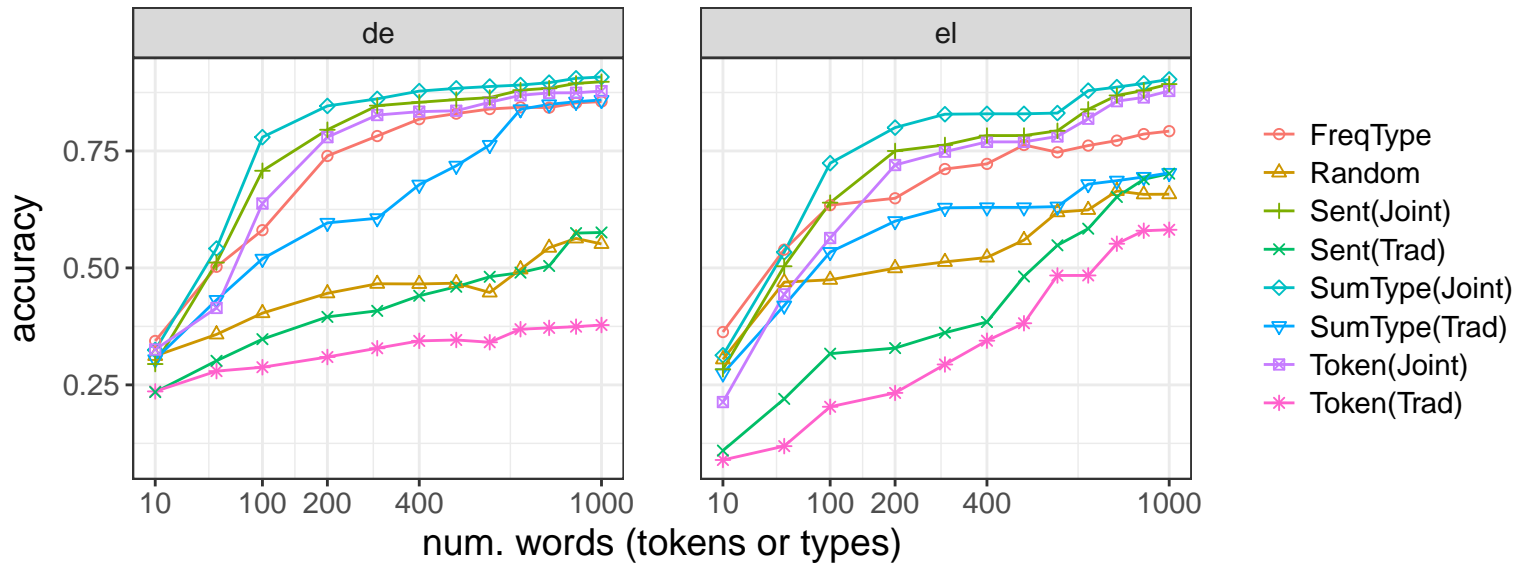

Supplement: Datasets [file active-learning-plot-2.pdf › camera/active-learning-plot-2.pdf]

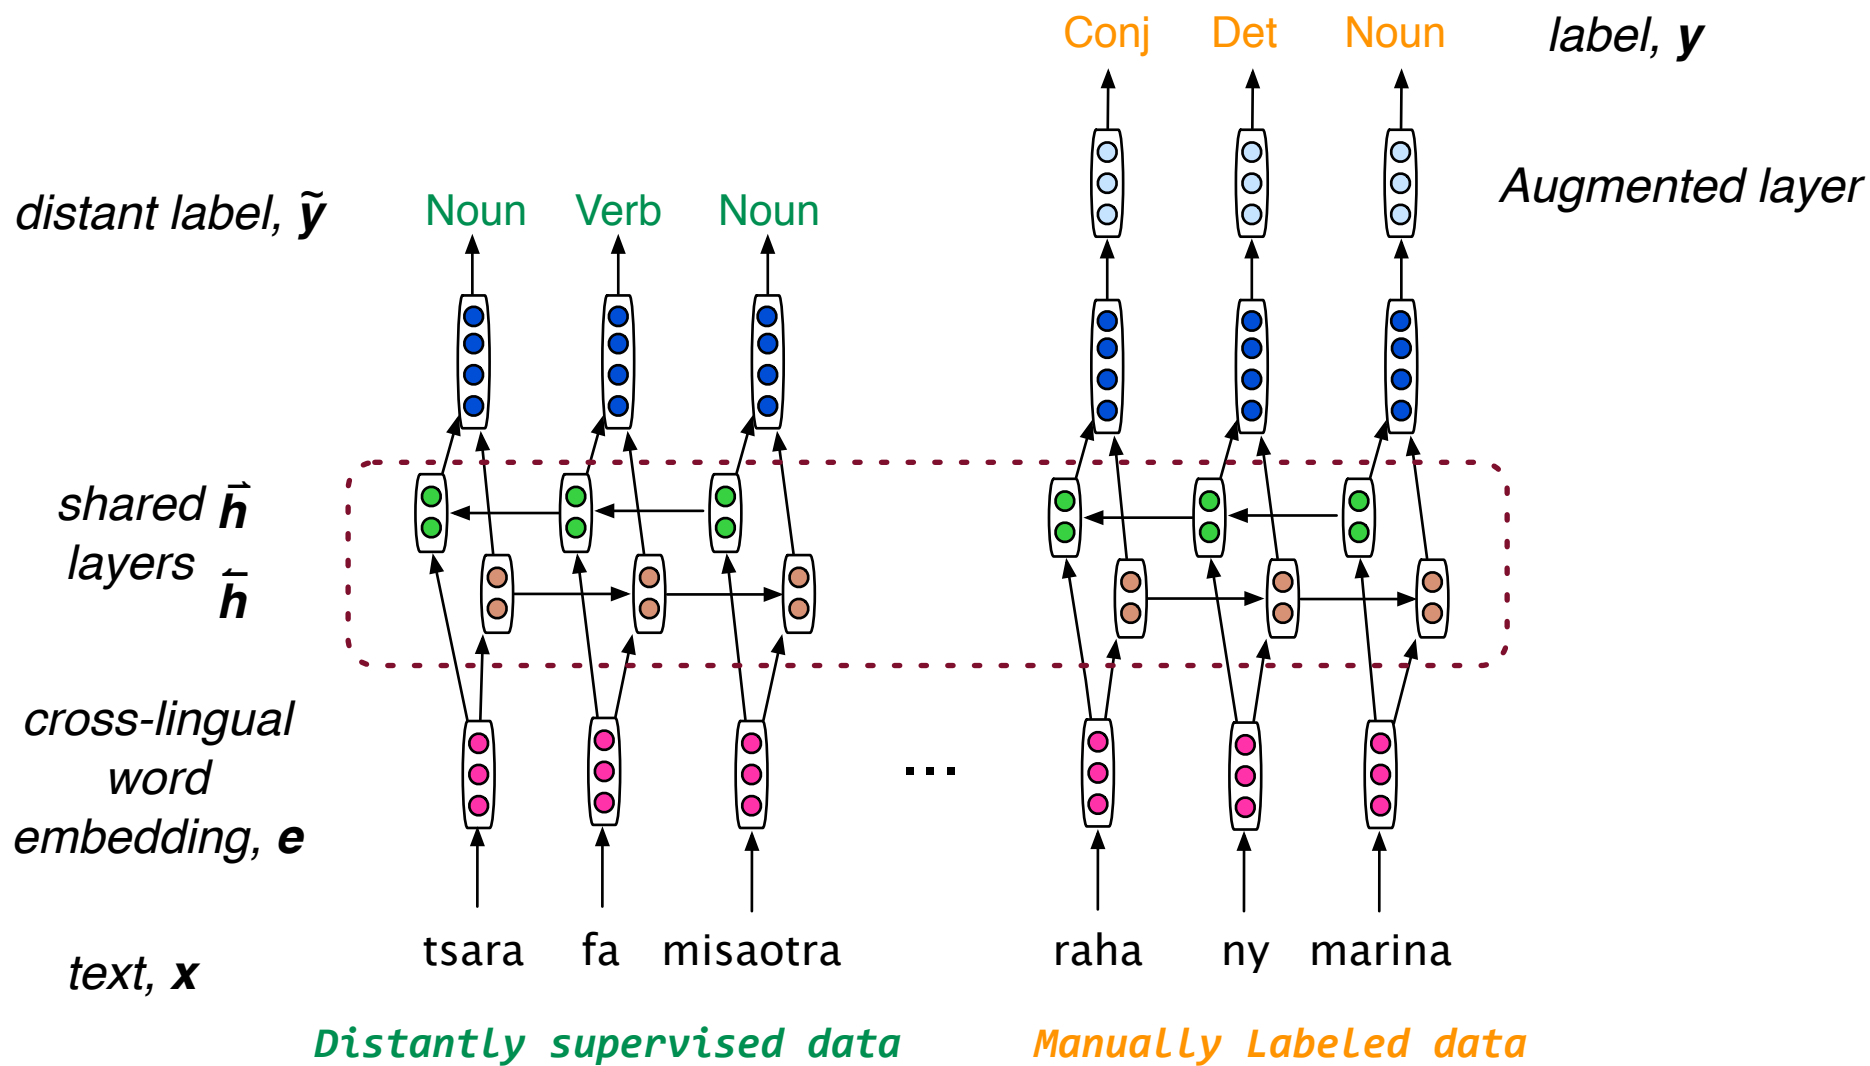

Supplement: Datasets [file dist-model.pdf › camera/dist-model.pdf]

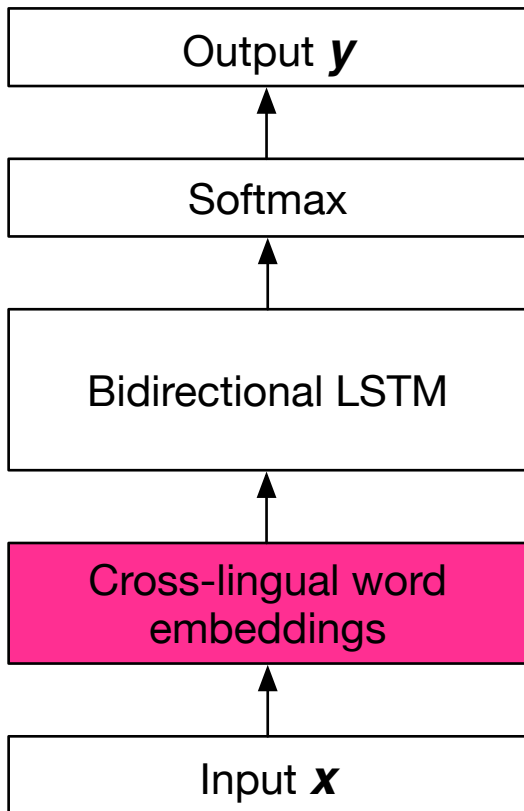

Supplement: Datasets [file unitagger.pdf › camera/unitagger.pdf]
